# Supplementary material
Source: PubMed Central journal article supplement (PMC7157965)
Supplement: UOEH_A_973113_SM1025.pdf [file UOEH_A_973113_SM1025.pdf]

| Record number                 | FC66      | FC67      | FC68     | FC69     | FC70     | FC71     | FC72     | FC73     | FC74     | FC75     |
|-------------------------------|-----------|-----------|----------|----------|----------|----------|----------|----------|----------|----------|
| Test date                     | 1/26/2011 | 1/31/2011 | 2/1/2011 | 2/1/2011 | 2/2/2011 | 2/2/2011 | 2/2/2011 | 2/4/2011 | 2/4/2011 | 2/4/2011 |
| Age                           | 18        | 19        | 18       | 20       | 21       | 23       | 19       | 20       | 21       | 19       |
| Gender                        | F         | M         | F        | F        | F        | F        | F        | M        | M        | F        |
| Height (inches)               | 64        | 71        | 62       | 62       | 66       | 64       | 66       | 71       | 73       | 64       |
| Weight (lbs)                  | 135       | 250       | 125      | 112      | 145      | 150      | 112      | 145      | 179      | 180      |
| Symptoms:                     |           |           |          |          |          |          |          |          |          |          |
| Fever/chills                  | x         | x         | x        | x        | x        | x        | x        | x        |          | x        |
| Headache                      |           | x         |          |          | x        | x        | x        | x        |          |          |
| Fatigue                       | x         | x         | x        | x        | x        | x        |          |          |          |          |
| Cough                         | x         | x         | x        | x        | x        |          | x        | x        |          | x        |
| Sore throat                   | x         | x         | x        | x        | x        |          | x        |          |          | x        |
| Sinus congestion              | x         | x         | x        |          | x        | x        | x        |          |          | x        |
| Runny nose                    |           | x         | x        |          | x        |          |          | x        |          | x        |
| Sneezing                      |           | x         | x        |          | x        |          | x        |          |          |          |
| Muscle aches                  | x         | x         | x        | x        |          | x        | x        | x        |          | x        |
| # days of symptoms            | 1         | 1         | 4        | 1        | 2        | 1        | 1        | 1        | 1        | 3        |
| Seasonal flu vaccine (y/n)    | n         | n         | n        | n        | n        | n        | n        | n        | n        | n        |
| Medication                    |           |           |          |          |          |          |          |          |          |          |
| Smoker (y/n/former)           | n         | n         | n        | n        | n        | n        | f        | n        | n        | y        |
| Temperature (deg C)           | 37.3      | 36.5      | 36.7     | 37.1     | 37.7     | 37.2     | 37.1     | 37.9     | 39.2     | 37.2     |
| Cough volume (liters)         | 1.95      | 2.46      | 2.2      | 1.73     | 2.32     | 2.07     | 2.09     | 2.7      | 2.57     | 2.63     |
| Cough volume (liters)         | 2.08      | 2.93      | 2.21     | 2.22     | 2.09     | 1.81     | 2.14     | 2.58     | 3.16     | 3.31     |
| Cough volume (liters)         | 2.1       | 3.03      | 1.97     | 2.07     | 2.18     | 1.62     | 1.77     | 2.19     | 3.45     | 2.46     |
| Cough volume (liters)         | 2.2       | 2.9       | 2.76     | 1.96     | 2.14     | 1.99     | 2.08     | 2.03     | 3.13     | 2.32     |
| Cough volume (liters)         | 1.98      | 3.12      | 2.52     | 1.88     | 2        | 1.68     | 2.04     | 2.01     | 3.53     | 3.16     |
| Cough volume (liters)         | 2.05      | 2.93      | 2.47     | 1.99     | 2.34     | 1.66     | 1.99     | 2.01     |          | 2.03     |
| Peak flowrate (liters/second) | 3.98      | 7.61      | 6.66     | 5.89     | 6.85     | 3.23     | 4.37     | 7.37     | 8.64     | 8.31     |
| Peak flowrate (liters/second) | 3.94      | 7.44      | 7.18     | 6.95     | 6.78     | 3.49     | 5.82     | 7.8      | 10.51    | 8.47     |
| Peak flowrate (liters/second) | 4.35      | 8.4       | 7.24     | 6.64     | 7.23     | 3.46     | 4.08     | 8.11     | 11.84    | 9.4      |
| Peak flowrate (liters/second) | 4.2       | 8.69      | 7.56     | 6.39     | 7.47     | 3.21     | 4.96     | 8.03     | 11.11    | 9.02     |
| Peak flowrate (liters/second) | 4.22      | 8.47      | 6.66     | 6.78     | 6.43     | 3.55     | 4.83     | 7.49     | 11.73    | 9.17     |
| Peak flowrate (liters/second) | 4.14      | 8.78      | 7.18     | 7.24     | 5.77     | 3.74     | 3.79     | 8.33     |          | 7.09     |

| FC76     | FC77     | FC78     | FC79     | FC80      | FC81      | FC82      | FC83      | FC84      | FC85      | FC86      | FC87      |
|----------|----------|----------|----------|-----------|-----------|-----------|-----------|-----------|-----------|-----------|-----------|
| 2/7/2011 | 2/8/2011 | 2/8/2011 | 2/8/2011 | 2/11/2011 | 2/14/2011 | 2/14/2011 | 2/15/2011 | 2/15/2011 | 2/15/2011 | 2/15/2011 | 2/17/2011 |
| 38       | 21       | 18       | 18       | 18        | 26        | 24        | 21        | 20        | 18        | 18        | 32        |
| M        | M        | F        | F        | M         | M         | M         | M         | F         | F         | M         | F         |
| 70       | 69       | 64       | 64       | 67        | 73        | 76        | 75        | 64        | 62        | 72        | 65        |
| 220      | 172      | 138      | 107      | 147       | 185       | 225       | 185       | 117       |           | 177       | 145       |
|          |          |          |          |           |           |           |           |           |           |           |           |
| x        | x        |          | x        | x         | x         | x         | x         | x         | x         | x         | x         |
|          | x        |          | x        | x         | x         | x         | x         | x         | x         | x         | x         |
| x        |          |          | x        | x         | x         | x         | x         | x         | x         | x         | x         |
| x        | x        | x        | x        | x         | x         | x         | x         | x         | x         | x         | x         |
| x        |          | x        | x        | x         | x         |           | x         | x         | x         | x         | x         |
|          | x        | x        | x        |           |           | x         |           |           |           | x         | x         |
| x        | x        | x        | x        | x         | x         | x         |           | x         |           | x         | x         |
| x        | x        |          | x        |           | x         | x         |           |           |           |           | x         |
| x        | x        |          | x        | x         | x         | x         | x         | x         | x         | x         | x         |
| 2        | 2        | 8        | 1        | 3         | 1         | 1         | 4         | 1         | 3         | 1         | 4         |
| y        | n        | n        | y        | n         | n         | n         | n         | n         | n         | n         | n         |
|          |          |          |          |           |           |           |           |           |           |           |           |
| f        | n        | n        | n        | n         | n         | n         | y         | y         | n         | n         | f         |
| 37.4     | 38.2     | 36.6     |          | 38.2      | 37.4      | 37.7      | 37        | 39        | 37.5      | 36.8      | 36.7      |
| 1.41     | 2.76     | 1.37     | 2.14     | 3.42      | 2.88      | 1.97      | 4.32      | 2.31      | 3.3       | 1.34      | 2.95      |
| 2.53     | 1.96     | 1.26     | 1.99     | 3.25      | 3.2       | 2.42      | 3.1       | 2.55      | 3.11      | 1.32      | 3.11      |
| 2.29     | 2.14     | 1.39     | 2.08     | 3.44      | 2.88      | 2.66      | 2.82      | 2.36      | 2.89      | 1.54      | 3.33      |
| 3.26     | 1.99     | 1.75     | 2.03     | 3.29      | 3.03      | 3         | 4.18      | 2.28      | 3.06      | 1.5       | 3.09      |
| 2.33     | 2.08     | 1.95     | 3.13     | 3.53      | 3.16      | 2.57      | 3.41      | 1.96      | 3.06      | 1.68      | 3.98      |
| 1.02     | 2.03     |          | 2.32     | 3.48      | 3.24      | 3.32      | 3.92      | 2.22      | 2.94      | 1.57      | 4.08      |
| 4.66     | 7.18     | 3.94     | 6.78     | 6.79      | 9.47      | 5.46      | 10.36     | 7.44      | 7.11      | 4.55      | 6.71      |
| 7.05     | 6.95     | 5.42     | 3.49     | 6.39      | 12.06     | 7.36      | 10.19     | 7.25      | 7.25      | 6.77      | 6.87      |
| 6.9      | 6.78     | 5.3      | 5.82     | 6.16      | 11.12     | 8.82      | 10.07     | 7.06      | 8.58      | 7.31      | 6.75      |
| 7.56     | 3.49     | 5.72     | 7.8      | 5.69      | 10.67     | 8.6       | 11.55     | 6.61      | 7.99      | 8.53      | 6.71      |
| 6.43     | 5.82     | 5.76     | 10.51    | 7.32      | 10.82     | 7.5       | 10.9      | 6.06      | 6.98      | 8.36      | 8.36      |
| 4.78     | 7.8      |          | 8.47     | 7.14      | 11.56     | 9.96      | 11.18     | 6.44      | 7.18      | 8.95      | 7.62      |

| FC88      | FC89      | FC90      | FC91      | FC92      | FC93      | FC94      | FC95      | FC96      | FC97      | FC100     | FC101     |
|-----------|-----------|-----------|-----------|-----------|-----------|-----------|-----------|-----------|-----------|-----------|-----------|
| 2/17/2011 | 2/18/2011 | 2/18/2011 | 2/21/2011 | 2/21/2011 | 2/21/2011 | 2/22/2011 | 2/23/2011 | 2/23/2011 | 2/24/2011 | 1/22/2014 | 1/23/2014 |
| 19        | 20        | 18        | 20        | 25        | 25        | 20        | 18        | 19        | 21        | 18        | 21        |
| M         | M         | F         | M         | M         | F         | M         | M         | M         | M         | M         | F         |
| 72        | 66        | 63        | 67        | 75        | 67        | 72        | 64        | 69        | 76        | 73        | 64        |
| 175       | 134       | 125       | 152       | 215       | 142       | 338       | 170       | 160       | 336       | 195       | 124       |
|           |           |           |           |           |           |           |           |           |           |           |           |
| x         | x         |           | x         | x         |           |           | x         | x         | x         | x         | x         |
| x         |           | x         | x         | x         |           |           | x         |           |           | x         | x         |
|           | x         | x         | x         |           | x         | x         | x         | x         | x         | x         | x         |
| x         | x         | x         | x         |           | x         | x         | x         | x         |           | x         | x         |
| x         |           | x         |           |           | x         | x         | x         | x         |           |           | x         |
|           |           | x         | x         | x         |           | x         |           | x         |           |           | x         |
| x         | x         | x         | x         |           | x         |           | x         | x         | x         | x         |           |
| x         |           | x         | x         |           | x         |           | x         | x         |           |           |           |
| x         |           | x         | x         | x         |           |           |           | x         | x         | x         | x         |
| 1         | 2         | 4         | 4         | 1         | 8         | 2         | 1         | 7         | 1         |           | 3         |
| n         | n         | n         | n         | n         | n         | y         | n         | n         | n         | n         | y         |
|           |           |           |           |           |           |           |           |           |           | n         | n         |
| n         | n         | n         | f         | n         | f         | y         | n         | y         | n         | n         | n         |
| 37.2      | 39.2      | 37.3      | 36.9      | 36.7      | 37.1      | 36.6      | 38.7      | 36.5      | 37.3      | 100.9     | 98.7      |
| 1.72      | 3.64      | 0.8       | 2.48      | 4.2       | 1.74      | 3.73      | 1.64      | 3.77      | 4.71      | 1.92      | 2.65      |
| 2.38      | 3.88      | 2.27      | 2.24      | 3.91      | 1.07      | 3.87      | 1.74      | 4.25      | 4.49      | 3.21      | 2.50      |
| 1.11      | 4.11      | 1.73      | 2.34      | 3.91      | 1.36      | 3.88      | 1.98      | 2.97      | 4.52      | 1.94      | 2.70      |
| 0.98      | 4.04      | 2         | 2.1       | 3.84      | 1.57      | 3.71      | 2.1       | 3.21      | 4.42      | 2.97      | 2.69      |
| 1.94      | 4.36      | 1.89      | 2.08      | 3.84      | 1.54      | 3.63      | 1.76      | 3.83      | 4.52      | 2.01      | 2.51      |
| 1.91      | 4.08      | 1.82      | 2.25      | 3.92      | 1.4       | 3.4       | 1.31      | 3.6       | 4.65      | 2.41      |           |
| 4.66      | 8.64      | 3.86      | 5.92      | 11.45     | 6.68      | 10.59     | 6.15      | 9.15      | 11.04     | 6.27      | 6.10      |
| 6.1       | 9.79      | 8.12      | 7.69      | 11.29     | 4.12      | 11.19     | 5.78      | 11.25     | 11.19     | 7.52      | 4.01      |
| 4.12      | 9.56      | 7.35      | 7.04      | 11.78     | 5.5       | 10.84     | 5.3       | 9.78      | 10.75     | 8.17      | 5.21      |
| 2.19      | 9.75      | 7.85      | 6.96      | 11.63     | 5.89      | 10.95     | 5.57      | 8.22      | 11.26     | 9.31      | 4.76      |
| 5.95      | 9.41      | 7.31      | 6         | 11.86     | 5.79      | 11.28     | 4.8       | 13.24     | 10.97     | 9.63      | 5.16      |
| 4.59      | 9.85      | 7.76      | 7.85      | 11.5      | 5.89      | 9.79      | 5.83      | 11.74     | 11.65     | 10.78     |           |

| FC102     | FC103     | FC104     | FC105     | FC106     | FC107     | FC108     | FC109     | FC110     | FC111         | FC112         |
|-----------|-----------|-----------|-----------|-----------|-----------|-----------|-----------|-----------|---------------|---------------|
| 1/23/2014 | 1/27/2014 | 1/28/2014 | 1/28/2014 | 1/28/2014 | 1/28/2014 | 1/28/2014 | 1/29/2014 | 1/31/2014 | 1/31/2014     | 2/4/2014      |
| 19        | 22        | 19        | 19        | 26        | 22        | 20        | 18        | 18        | 19            | 26            |
| F         | F         | F         | M         | M         | M         | F         | M         | F         | M             | M             |
| 63        | 66        | 64        | 67        | 72        | 70        | 66        | 68        | 69        | 71            | 69            |
| 125       | 165       | 109       | 173       | 200       | 160       | 181       | 140       | 200       | 138           | 165           |
|           |           |           |           |           |           |           |           |           |               |               |
| x         | x         | x         | x         | x         | x         | x         | x         | x         | x             | x             |
| x         | x         | x         | x         | x         | x         | x         | x         | x         | x             |               |
|           | x         | x         |           | x         | x         | x         | x         | x         |               |               |
| x         | x         | x         | x         | x         | x         | x         | x         | x         | x             |               |
| x         | x         |           | x         |           | x         | x         |           | x         | x             | x             |
|           | x         | x         | x         |           | x         | x         | x         | x         | x             |               |
| x         | x         | x         | x         | x         | x         | x         | x         | x         | x             |               |
| x         | x         | x         |           | x         |           | x         | x         |           |               | x             |
| 3         |           | 2         | 3         | 2         | 7         | 4         | 1         | 2         |               | 2             |
| n         | n         | n         | n         | n         | n         | n         | n         | y         | y             | y             |
| n         | n         | ibuprofen | n         | ibuprofen | n         | n         | n         | Dayquil   | acetaminophen | acetaminophen |
| n         | n         | y         | n         | y         | n         | n         | n         | n         | n             | n             |
| 99.4      | 98.3      | 98.7      | 99.5      | 97.9      | 98.7      | 98.8      | 100.8     | 98.5      | 99            | 99.9          |
| 1.94      | 1.35      | 2.86      | 2.16      | 2.34      | 1.75      | 2.42      | 2.11      |           | 1.95          | 2.01          |
| 2.10      | 1.95      | 2.66      | 1.89      | 1.78      | 4.50      | 2.49      | 1.84      |           | 1.72          | 3.84          |
| 2.19      | 1.66      | 2.39      | 2.29      | 1.75      | 4.21      | 2.40      | 2.56      |           | 2.08          | 4.34          |
| 1.79      | 1.94      | 1.95      | 1.98      | 1.50      | 2.73      |           | 2.91      |           | 1.85          | 4.37          |
| 1.81      | 1.62      | 2.67      | 1.91      | 2.21      | 3.80      |           | 2.46      |           | 1.98          | 4.20          |
|           | 1.57      |           | 2.16      | 2.00      | 3.36      |           | 2.59      |           | 1.96          | 3.36          |
| 4.55      | 5.94      | 7.72      | 7.04      | 9.24      | 4.24      | 5.03      | 6.63      |           | 7.04          | 6.90          |
| 5.20      | 6.86      | 7.29      | 6.98      | 8.99      | 8.75      | 5.73      | 4.68      |           | 4.00          | 11.12         |
| 5.05      | 6.29      | 6.87      | 6.62      | 7.80      | 9.59      | 5.41      | 6.83      |           | 4.99          | 11.37         |
| 4.84      | 7.03      | 7.21      | 8.31      | 7.78      | 6.91      |           | 8.53      |           | 4.98          | 11.20         |
| 5.17      | 6.01      | 7.00      | 6.55      | 5.91      | 8.60      |           | 6.71      |           | 5.76          | 11.62         |
|           | 6.17      |           | 7.16      | 7.72      | 7.46      |           | 6.98      |           | 5.28          | 11.61         |

| FC113         | FC114    | FC115                   | FC116    | FC117     | FC118                     | FC119                  |
|---------------|----------|-------------------------|----------|-----------|---------------------------|------------------------|
| 2/5/2014      | 2/6/2014 | 2/6/2014                | 2/7/2014 | 2/10/2014 | 2/11/2014                 | 2/12/2014              |
| 20            | 19       | 20                      | 19       | 19        | 22                        | 20                     |
| F             | F        | F                       | M        | M         | F                         | F                      |
| 64            | 60       | 59                      | 73       | 73        | 68                        | 64                     |
| 128           | 118      | 194                     | 210      | 175       | 140                       | 140                    |
|               |          |                         |          |           |                           |                        |
| x             | x        | x                       | x        |           | x                         |                        |
| x             | x        | x                       | x        | x         | x                         | x                      |
| x             | x        | x                       | x        | x         |                           |                        |
| x             |          | x                       |          | x         |                           | x                      |
| x             |          | x                       | x        | x         | x                         | x                      |
| x             |          |                         | x        |           | x                         | x                      |
| x             |          |                         | x        | x         | x                         |                        |
| x             |          | x                       |          |           |                           |                        |
| x             | x        | x                       | x        |           | x                         | x                      |
| 1             | 2        | 3                       | 3        | 3         | 1                         |                        |
| n             | n        | n                       | n        | n         | n                         | n                      |
| acetaminophen | n        | acetaminophen & Tamiflu | n        | n         | acetaminophen & ibuprofen | Alkaseltzer cold & flu |
| n             | n        | n                       | n        | n         | n                         | n                      |
| 100.4         | 98.8     | 98.4                    | 99.5     | 98.1      | 98.7                      | 98.1                   |
| 1.66          | 2.22     |                         | 1.30     | 2.67      | 2.28                      | 1.88                   |
| 2.01          | 2.50     |                         | 3.55     | 3.58      | 0.23                      | 2.05                   |
| 1.78          | 3.14     |                         | 3.44     | 3.65      | 2.26                      | 2.01                   |
| 1.61          | 2.49     |                         | 3.14     | 3.69      | 2.25                      | 0.15                   |
| 1.49          | 3.02     |                         | 2.94     | 4.04      | 2.20                      | 2.55                   |
| 1.42          | 3.07     |                         |          | 3.97      |                           | 2.28                   |
| 5.16          | 5.82     |                         | 4.54     | 8.33      | 5.05                      | 5.61                   |
| 5.59          | 6.95     |                         | 10.17    | 8.61      | 1.03                      | 5.71                   |
| 6.09          | 7.35     |                         | 11.26    | 9.33      | 7.19                      | 5.43                   |
| 5.43          | 7.25     |                         | 10.50    | 8.47      | 7.43                      | 1.05                   |
| 5.52          | 7.22     |                         | 10.48    | 9.67      | 7.09                      | 6.25                   |
| 5.56          | 7.15     |                         |          | 8.61      |                           | 6.52                   |

| FC120     | FC121     | FC122     | FC123     | FC124     | FC125     | FC126     | FC127     | FC128     | FC129     | FC130     | FC131     |
|-----------|-----------|-----------|-----------|-----------|-----------|-----------|-----------|-----------|-----------|-----------|-----------|
| 2/12/2014 | 2/12/2014 | 2/12/2014 | 2/12/2014 | 2/12/2014 | 2/13/2014 | 2/13/2014 | 2/14/2014 | 2/14/2014 | 2/14/2014 | 2/17/2014 | 2/18/2014 |
| 19        | 22        | 20        | 21        | 19        | 25        | 20        | 22        | 21        | 18        | 20        | 22        |
| F         | F         | M         | M         | M         | M         | F         | M         | M         | M         | F         | F         |
| 68        | 67        | 68        | 69        | 76        | 67        | 60        | 69        | 67        | 70        | 63        | 62        |
| 152       | 165       | 146       | 240       | 171       | 200       | 120       | 180       | 181       | 190       | 140       | 154       |
|           | x         | x         | x         | x         |           | x         | x         | x         | x         |           |           |
| x         | x         |           |           | x         |           |           |           | x         | x         |           |           |
| x         | x         | x         | x         | x         |           |           |           | x         | x         |           |           |
| x         | x         | x         | x         | x         | x         | x         | x         | x         | x         | x         | x         |
| x         | x         | x         |           |           |           | x         |           | x         | x         | x         |           |
| x         |           | x         | x         | x         |           |           | x         | x         | x         | x         |           |
|           |           | x         |           | x         |           | x         | x         |           | x         | x         |           |
|           |           |           |           | x         |           | x         |           |           | x         |           |           |
|           | x         | x         |           | x         |           | x         |           | x         | x         |           |           |
| 3         | 2         | 3         | 6         | 2         | 3         | 3         | 7         | 2         | 5         | 30        |           |
| n         | n         | n         | n         | n         | y         | n         | n         | n         | n         | y         | y         |
| n         | n         | n         | n         | ibuprofen | n         | yes       | n         | Advil     | n         | n         | n         |
| n         | y         | n         | n         | n         | n         | n         | n         | n         | n         | n         | n         |
| 99.3      | 98.4      | 98.8      | 98.5      | 98.8      | 98.5      | 98.3      | 98.3      | 98.8      | 98.6      | 98.2      | 98.2      |
| 3.17      | 0.79      | 4.24      | 2.84      | 3.45      | 2.57      | 1.20      | 3.36      | 3.20      | 1.37      | 3.05      | 2.11      |
| 2.28      | 1.18      | 4.19      | 3.06      | 3.60      | 2.71      | 2.02      | 3.65      | 2.91      | 2.40      | 2.79      | 1.77      |
| 2.34      | 1.71      | 4.06      | 3.22      | 3.22      | 0.54      | 1.70      | 3.43      | 3.48      | 1.32      | 2.59      | 1.97      |
| 2.42      | 1.79      | 4.05      | 3.18      | 2.97      | 2.15      | 1.30      | 2.76      | 3.42      | 2.06      | 2.77      | 2.07      |
| 2.43      | 0.07      | 4.21      | 3.28      | 2.81      | 2.29      | 1.61      | 3.54      | 3.08      | 3.23      | 2.07      | 2.07      |
| 2.41      | 0.70      | 4.14      | 3.03      | 3.07      | 2.17      | 1.65      | 2.99      | 3.57      | 3.38      | 2.45      | 1.80      |
| 6.14      | 2.81      | 11.10     | 8.26      | 6.96      | 9.60      | 5.81      | 7.92      | 7.31      | 8.23      | 8.09      | 5.38      |
| 6.09      | 4.18      | 11.69     | 9.39      | 8.34      | 10.27     | 11.04     | 7.27      | 9.89      | 9.70      | 8.70      | 5.60      |
| 5.61      | 5.11      | 11.32     | 9.33      | 8.34      | 3.87      | 6.72      | 7.96      | 10.13     | 8.34      | 8.92      | 5.82      |
| 5.70      | 5.48      | 10.06     | 9.15      | 8.54      | 10.07     | 6.45      | 7.74      | 9.79      | 9.46      | 8.47      | 5.56      |
| 5.77      | 1.39      | 10.77     | 8.79      | 7.54      | 10.01     | 6.02      | 8.65      | 5.60      | 9.83      | 8.57      | 5.81      |
| 4.43      | 4.18      | 10.72     | 8.39      | 8.45      | 10.65     | 6.50      | 7.38      | 10.33     | 10.20     | 7.33      | 5.65      |
