# Supplementary material
Source: PubMed Central journal article supplement (PMC7157965)
Supplement: UOEH_A_973113_SM1105.pdf [file UOEH_A_973113_SM1105.pdf]

For the VRA and quantitative PCR results, anything below the detection limit (10 viral copies in reaction volume) is listed as 0

All data has been adjusted to show the quantity in the original sample volume

Blue shading indicates swab was positive by VPA & confirmed by VRA, but cough was negative

Orange shading indicates cough was positive by VPA & confirmed by VRA

| Subject #            | Viral plaque assay (VPA) |          |          |          | Viral replication assay (VRA) |          |            |            |
|----------------------|--------------------------|----------|----------|----------|-------------------------------|----------|------------|------------|
|                      | Swabs                    | SKC      | Elbow    | Tray     | Swabs                         | SKC      | Elbow      | Tray       |
|                      | PFU                      | PFU      | PFU      | PFU      | M COPY #                      | M COPY # |            |            |
| <b>2011 patients</b> |                          |          |          |          |                               |          |            |            |
| FC66                 | 0.00E+00                 | 0.00E+00 | 0.00E+00 | 0.00E+00 | 0.00E+00                      | 0.00E+00 | 0.00E+00   | 0.00E+00   |
| FC67                 | 0.00E+00                 | 0.00E+00 | 0.00E+00 | 0.00E+00 | 0.00E+00                      | 0.00E+00 | 0.00E+00   | 0.00E+00   |
| FC68                 | N/A                      | 0.00E+00 | 0.00E+00 | 0.00E+00 | N/A                           | 0.00E+00 | 0.00E+00   | 0.00E+00   |
| FC69                 | N/A                      | 0.00E+00 | 0.00E+00 | 0.00E+00 | N/A                           | 0.00E+00 | 1.54E+04   | 0.00E+00   |
| FC70                 | N/A                      | 0.00E+00 | 0.00E+00 | 0.00E+00 | N/A                           | 0.00E+00 | 0.00E+00   | 0.00E+00   |
| FC71                 | 0.00E+00                 | 0.00E+00 | 0.00E+00 | 0.00E+00 | 0.00E+00                      | 0.00E+00 | 0.00E+00   | 0.00E+00   |
| FC72                 | 0.00E+00                 | 0.00E+00 | 0.00E+00 | 0.00E+00 | 0.00E+00                      | 0.00E+00 | 0.00E+00   | 0.00E+00   |
| FC73                 | N/A                      | 0.00E+00 | 0.00E+00 | 0.00E+00 | N/A                           | 0.00E+00 | 0.00E+00   | 0.00E+00   |
| FC74                 | N/A                      | 0.00E+00 | 0.00E+00 | 0.00E+00 | N/A                           | 0.00E+00 | 0.00E+00   | 0.00E+00   |
| FC75                 | N/A                      | 0.00E+00 | 0.00E+00 | 0.00E+00 | 0.00E+00                      | 0.00E+00 | 0.00E+00   | 0.00E+00   |
| FC76                 | 3.38E+05                 | 0.00E+00 | 0.00E+00 | 0.00E+00 | 2.41E+07                      | 0.00E+00 | 0.00E+00   | 0.00E+00   |
| FC77                 | N/A                      | 0.00E+00 | 0.00E+00 | 0.00E+00 | N/A                           | 0.00E+00 | 0.00E+00   | 0.00E+00   |
| FC78                 | N/A                      | 0.00E+00 | 0.00E+00 | 0.00E+00 | N/A                           | 0.00E+00 | 0.00E+00   | 0.00E+00   |
| FC79                 | N/A                      | 0.00E+00 | 0.00E+00 | 0.00E+00 | N/A                           | 4.39E+04 | 9.80E+03   | 3.30E+04   |
| FC80                 | 2.13E+05                 | 0.00E+00 | 0.00E+00 | 0.00E+00 | 1.17E+08                      | 0.00E+00 | 0.00E+00   | 0.00E+00   |
| FC81                 | 1.21E+05                 | 0.00E+00 | 0.00E+00 | 0.00E+00 | 1.47E+08                      | 0.00E+00 | 0.00E+00   | 0.00E+00   |
| FC82                 | 9.00E+05                 | 0.00E+00 | 3.75E+00 | 0.00E+00 | 1.66E+08                      | 0.00E+00 | 0.00E+00   | 0.00E+00   |
| FC83                 | 0.00E+00                 | 0.00E+00 | 0.00E+00 | 0.00E+00 | 5.46E+04                      | 0.00E+00 | 0.00E+00   | 0.00E+00   |
| FC84                 | 2.50E+01                 | 6.25E+00 | 0.00E+00 | 0.00E+00 | 8.16E+07                      | 2.91E+06 | 0.00E+00   | 0.00E+00   |
| FC85                 | 0.00E+00                 | 0.00E+00 | 0.00E+00 | 0.00E+00 | 0.00E+00                      | 0.00E+00 | 0.00E+00   | 0.00E+00   |
| FC86                 | N/A                      | 0.00E+00 | 0.00E+00 | 0.00E+00 | N/A                           | 0.00E+00 | 0.00E+00   | 0.00E+00   |
| FC87                 | 0.00E+00                 | 0.00E+00 | 0.00E+00 | 0.00E+00 | 0.00E+00                      | 0.00E+00 | 0.00E+00   | 0.00E+00   |
| FC88                 | N/A                      | 3.56E+02 | 0.00E+00 | 0.00E+00 | N/A                           | 1.99E+06 | 2.85E+05   | 0.00E+00   |
| FC89                 | 8.88E+03                 | 0.00E+00 | 0.00E+00 | 0.00E+00 | 0.00E+00                      | 0.00E+00 | 0.00E+00   | 0.00E+00   |
| FC90                 | 0.00E+00                 | 0.00E+00 | 0.00E+00 | 0.00E+00 | 4.47E+06                      | 0.00E+00 | 0.00E+00   | 0.00E+00   |
| FC91                 | 1.25E+01                 | 0.00E+00 | 0.00E+00 | 0.00E+00 | 0.00E+00                      | 0.00E+00 | 0.00E+00   | 0.00E+00   |
| FC92                 | 0.00E+00                 | 0.00E+00 | 0.00E+00 | 0.00E+00 | 0.00E+00                      | 0.00E+00 | 0.00E+00   | 0.00E+00   |
| FC93                 | 0.00E+00                 | 0.00E+00 | 0.00E+00 | 0.00E+00 | 0.00E+00                      | 0.00E+00 | 0.00E+00   | 0.00E+00   |
| FC94                 | N/A                      | 0.00E+00 | 0.00E+00 | 0.00E+00 | N/A                           | 0.00E+00 | 0.00E+00   | 0.00E+00   |
| FC95                 | 5.13E+04                 | 5.38E+02 | 2.63E+01 | 6.25E+00 | 5.52E+10                      | 4.40E+08 | 1.76E+06   | 1.47E+06   |
| FC96                 | 0.00E+00                 | 0.00E+00 | 0.00E+00 | 0.00E+00 | 2.86E+04                      | 0.00E+00 | 0.00E+00   | 0.00E+00   |
| FC97                 | 2.11E+04                 | 0.00E+00 | 0.00E+00 | 0.00E+00 | 8.01E+06                      | 0.00E+00 | 0.00E+00   | 0.00E+00   |
| <b>2014 patients</b> |                          |          |          |          |                               |          |            |            |
| FC100                | 6.00E+00                 | 5.00E+00 | 0.00E+00 | 0.00E+00 | 0.00E+00                      | 1.49E+03 | Not tested | Not tested |
| FC101                | 0.00E+00                 | 0.00E+00 | 0.00E+00 | 0.00E+00 | 0.00E+00                      | 0.00E+00 | Not tested | Not tested |
| FC102                | 2.63E+04                 | 0.00E+00 | 0.00E+00 | 0.00E+00 | 5.93E+06                      | 0.00E+00 | Not tested | Not tested |

|       |          |          |          |          |          |          |          |            |            |
|-------|----------|----------|----------|----------|----------|----------|----------|------------|------------|
| FC103 | 0.00E+00 | Not tested | Not tested |
| FC104 | 2.55E+06 | 2.50E+01 | 0.00E+00 | 0.00E+00 | 2.92E+08 | 1.30E+04 | 0.00E+00 | Not tested | Not tested |
| FC105 | 1.14E+02 | 0.00E+00 | 0.00E+00 | 0.00E+00 | 9.62E+04 | 0.00E+00 | 0.00E+00 | Not tested | Not tested |
| FC106 | 6.86E+04 | 0.00E+00 | 0.00E+00 | 0.00E+00 | 2.85E+07 | 6.74E+02 | 0.00E+00 | Not tested | Not tested |
| FC107 | 0.00E+00 | Not tested | Not tested |
| FC108 | 0.00E+00 | Not tested | Not tested |
| FC109 | 3.90E+07 | 5.00E+01 | 0.00E+00 | 0.00E+00 | 4.40E+07 | 1.26E+04 | 0.00E+00 | Not tested | Not tested |
| FC110 | 0.00E+00 | Not tested | Not tested |
| FC111 | 0.00E+00 | Not tested | Not tested |
| FC112 | 0.00E+00 | Not tested | Not tested |
| FC113 | 8.03E+04 | 5.00E+00 | 0.00E+00 | 0.00E+00 | 3.09E+07 | 0.00E+00 | 0.00E+00 | Not tested | Not tested |
| FC114 | 0.00E+00 | Not tested | Not tested |
| FC115 | 0.00E+00 | Not tested | Not tested |
| FC116 | 0.00E+00 | Not tested | Not tested |
| FC117 | 0.00E+00 | Not tested | Not tested |
| FC118 | 0.00E+00 | Not tested | Not tested |
| FC119 | 0.00E+00 | Not tested | Not tested |
| FC120 | 0.00E+00 | Not tested | Not tested |
| FC121 | 8.10E+03 | 0.00E+00 | 0.00E+00 | 0.00E+00 | 2.67E+06 | 0.00E+00 | 0.00E+00 | Not tested | Not tested |
| FC122 | 0.00E+00 | Not tested | Not tested |
| FC123 | 7.73E+04 | 1.25E+01 | 0.00E+00 | 0.00E+00 | 1.61E+07 | 4.14E+03 | 0.00E+00 | Not tested | Not tested |
| FC124 | 0.00E+00 | Not tested | Not tested |
| FC125 | 0.00E+00 | Not tested | Not tested |
| FC126 | 0.00E+00 | Not tested | Not tested |
| FC127 | 0.00E+00 | Not tested | Not tested |
| FC128 | 0.00E+00 | Not tested | Not tested |
| FC129 | 0.00E+00 | Not tested | Not tested |
| FC130 | 0.00E+00 | Not tested | Not tested |
| FC131 | 0.00E+00 | Not tested | Not tested |

**Quantitative PCR on sample collected**

| Swabs           | SKC             | Elbow           | Tray            |
|-----------------|-----------------|-----------------|-----------------|
| <u>M COPY #</u> | <u>M COPY #</u> | <u>M COPY #</u> | <u>M COPY #</u> |
| 0.00E+00        | 0.00E+00        | 0.00E+00        | 0.00E+00        |
| 0.00E+00        | 0.00E+00        | 0.00E+00        | 0.00E+00        |
| N/A             | 0.00E+00        | 0.00E+00        | 0.00E+00        |
| N/A             | 0.00E+00        | 0.00E+00        | 0.00E+00        |
| N/A             | 0.00E+00        | 0.00E+00        | 0.00E+00        |
| 0.00E+00        | 0.00E+00        | 0.00E+00        | 0.00E+00        |
| 0.00E+00        | 0.00E+00        | 0.00E+00        | 0.00E+00        |
| N/A             | 0.00E+00        | 0.00E+00        | 0.00E+00        |
| N/A             | 0.00E+00        | 0.00E+00        | 0.00E+00        |
| N/A             | 0.00E+00        | 0.00E+00        | 0.00E+00        |
| 1.65E+04        | 0.00E+00        | 0.00E+00        | 0.00E+00        |
| N/A             | 0.00E+00        | 0.00E+00        | 0.00E+00        |
| N/A             | 0.00E+00        | 0.00E+00        | 0.00E+00        |
| N/A             | 0.00E+00        | 0.00E+00        | 1.06E+03        |
| 3.56E+04        | 0.00E+00        | 0.00E+00        | 0.00E+00        |
| 2.04E+04        | 0.00E+00        | 0.00E+00        | 0.00E+00        |
| 3.46E+04        | 0.00E+00        | 0.00E+00        | 0.00E+00        |
| 0.00E+00        | 0.00E+00        | 0.00E+00        | 0.00E+00        |
| 2.33E+04        | 0.00E+00        | 0.00E+00        | 0.00E+00        |
| 0.00E+00        | 0.00E+00        | 0.00E+00        | 0.00E+00        |
| N/A             | 0.00E+00        | 0.00E+00        | 0.00E+00        |
| 0.00E+00        | 0.00E+00        | 0.00E+00        | 0.00E+00        |
| N/A             | 0.00E+00        | 0.00E+00        | 0.00E+00        |
| 1.28E+03        | 0.00E+00        | 0.00E+00        | 0.00E+00        |
| 0.00E+00        | 0.00E+00        | 0.00E+00        | 0.00E+00        |
| 2.23E+02        | 0.00E+00        | 0.00E+00        | 0.00E+00        |
| 0.00E+00        | 0.00E+00        | 0.00E+00        | 0.00E+00        |
| 0.00E+00        | 0.00E+00        | 0.00E+00        | 0.00E+00        |
| N/A             | 0.00E+00        | 0.00E+00        | 0.00E+00        |
| 9.56E+05        | 3.21E+05        | 2.30E+03        | 2.94E+03        |
| 0.00E+00        | 0.00E+00        | 0.00E+00        | 0.00E+00        |
| 1.54E+03        | 0.00E+00        | 0.00E+00        | 0.00E+00        |
| 0.00E+00        | 0.00E+00        | 0.00E+00        | 0.00E+00        |
| 0.00E+00        | 0.00E+00        | 0.00E+00        | 0.00E+00        |
| 1.36E+03        | 0.00E+00        | 0.00E+00        | 0.00E+00        |

|          |          |          |          |
|----------|----------|----------|----------|
| 0.00E+00 | 0.00E+00 | 0.00E+00 | 0.00E+00 |
| 1.94E+05 | 0.00E+00 | 0.00E+00 | 0.00E+00 |
| 0.00E+00 | 0.00E+00 | 0.00E+00 | 0.00E+00 |
| 1.02E+04 | 0.00E+00 | 0.00E+00 | 0.00E+00 |
| 0.00E+00 | 0.00E+00 | 0.00E+00 | 0.00E+00 |
| 0.00E+00 | 0.00E+00 | 0.00E+00 | 0.00E+00 |
| 6.22E+05 | 0.00E+00 | 0.00E+00 | 0.00E+00 |
| 0.00E+00 | 0.00E+00 | 0.00E+00 | 0.00E+00 |
| 0.00E+00 | 0.00E+00 | 0.00E+00 | 0.00E+00 |
| 0.00E+00 | 0.00E+00 | 0.00E+00 | 0.00E+00 |
| 2.58E+03 | 0.00E+00 | 0.00E+00 | 0.00E+00 |
| 0.00E+00 | 0.00E+00 | 0.00E+00 | 0.00E+00 |
| 0.00E+00 | 0.00E+00 | 0.00E+00 | 0.00E+00 |
| 0.00E+00 | 0.00E+00 | 0.00E+00 | 0.00E+00 |
| 0.00E+00 | 0.00E+00 | 0.00E+00 | 0.00E+00 |
| 0.00E+00 | 0.00E+00 | 0.00E+00 | 0.00E+00 |
| 0.00E+00 | 0.00E+00 | 0.00E+00 | 0.00E+00 |
| 0.00E+00 | 0.00E+00 | 0.00E+00 | 0.00E+00 |
| 0.00E+00 | 0.00E+00 | 0.00E+00 | 0.00E+00 |
| 0.00E+00 | 0.00E+00 | 0.00E+00 | 0.00E+00 |
| 0.00E+00 | 0.00E+00 | 0.00E+00 | 0.00E+00 |
| 0.00E+00 | 0.00E+00 | 0.00E+00 | 0.00E+00 |
| 0.00E+00 | 0.00E+00 | 0.00E+00 | 0.00E+00 |
| 2.12E+03 | 0.00E+00 | 0.00E+00 | 0.00E+00 |
| 0.00E+00 | 0.00E+00 | 0.00E+00 | 0.00E+00 |
| 0.00E+00 | 0.00E+00 | 0.00E+00 | 0.00E+00 |
| 0.00E+00 | 0.00E+00 | 0.00E+00 | 0.00E+00 |
| 0.00E+00 | 1.33E+03 | 0.00E+00 | 0.00E+00 |
| 0.00E+00 | 0.00E+00 | 0.00E+00 | 0.00E+00 |
| 0.00E+00 | 0.00E+00 | 0.00E+00 | 0.00E+00 |
| 0.00E+00 | 0.00E+00 | 0.00E+00 | 0.00E+00 |
| 0.00E+00 | 0.00E+00 | 0.00E+00 | 0.00E+00 |
